1 **Connexin 43 plays an important role in the transformation of**  
2 **human cholangiocytes upon stimulation with *Clonochis sinensis***  
3 **excretory-secretory protein and *N*-nitrosodimethylamine**

4  
5 **Short title: Connexin 43 is an important target in human**  
6 **cholangiocarcinoma**

7 Eun-Min Kim<sup>1</sup>, Young Mee Bae<sup>2</sup>, Min-Ho Choi<sup>2</sup>, Sung-Tae Hong<sup>2\*</sup>

8 <sup>1</sup> Department of Environmental Medical Biology and Arthropods of  
9 Medical Importance Resource Research Bank, Institute of Tropical  
10 Medicine, Yonsei University College of Medicine, Seoul, Republic of  
11 Korea

12  
13 <sup>2</sup> Department of Parasitology and Tropical Medicine and Institute of  
14 Endemic Diseases, Seoul National University College of Medicine,  
15 Seoul, Republic of Korea

16  
17  
18 \*Corresponding author  
19 E-mail: [hst@snu.ac.kr](mailto:hst@snu.ac.kr) (STH)

20

21 .

22

23

24

25

26

27

28

## 29 **Abstract**

## 30 **Background**

31 *Clonorchis sinensis* is a group I bio-carcinogen responsible for  
32 cholangiocarcinoma (CHCA) in humans. However, the mechanism by which  
33 *C. sinensis* promotes carcinogenesis is unclear.

## 34 **Methodology**

35 Using the human cholangiocyte line H69, we investigated cell proliferation  
36 and gap junction protein expression after stimulation with the hepatotoxin *N*-  
37 nitrosodimethylamine (NDMA) and/or excretory-secretory products (ESP) of  
38 *C. sinensis*, which induce inflammation. NDMA and ESP treatment increased  
39 proliferation by 146% and the proportion of cells in the G2/M phase by 37%.  
40 Moreover, the expression of the cell cycle protein E2F1 and the cell  
41 proliferation-related proteins Ki-67 and cytokeratin 19 increased in response  
42 to combined treatment with NDMA and ESP. The gap-junction proteins  
43 connexin (Cx) 43 and Cx26 also increased. In contrast, Cx32 expression  
44 decreased in cells treated with NDMA and ESP. Cox-2 was also upregulated.  
45 Silencing of Cx43 reduced cell proliferation and significantly suppressed  
46 Cx26 and Cox-2 expression.

## 47 **Conclusions**

48 These results suggest that Cx43 is an important factor in CHCA induced by *C.*  
49 *sinensis* ESP and NDMA and further investigations targeting this pathway  
50 may allow prevention of this deadly disease.

## 51 **Author summary**

52 *Clonorchis sinensis*, a human fluke, resides in the liver of humans and is  
53 commonly found in the common bile duct and gall bladder. This parasite is  
54 the main cause of cholangiocarcinoma, also called bile duct cancer, in  
55 humans. Of note, the excretory-secretory products (ESP) of *C. sinensis* are  
56 known to cause inflammation in the biliary epithelium, which may ultimately  
57 result in neoplasms via production of reactive oxygen species and subsequent  
58 DNA damage. Together with *N*-nitrosodimethylamine (NDMA), a potent  
59 hepatotoxin that can cause fibrosis and tumors in the liver, ESP led to an  
60 increase in the growth and proliferation of cholangiocytes. Our results showed  
61 that the ESPs of *C. sinensis* induced pro-inflammatory responses by  
62 increasing the levels of proinflammatory cytokines and nuclear factor kappa B  
63 (NF $\kappa$ B), which in turn, enhanced the production of connexin 43 (Cx43), a  
64 gap-junction protein. Therefore, Cx 43 can serve as a potential target for  
65 developing a therapeutic strategy for the treatment of cholangiocarcinoma in  
66 humans.

67

## 68 **Introduction**

69 *Clonorchis sinensis* is a human liver fluke that induces cholangiocarcinoma  
70 (CHCA) in humans [1]. Clonorchiasis has been endemic in Asia for a long  
71 time, especially among residents who live along rivers and consume raw

72 freshwater fish [2].

73 The mechanism by which *C. sinensis* induces CHCA is not well  
74 understood, but chronic hepatobiliary damage, a precursor to CHCA, in  
75 clonorchiasis is a multi-factorial outcome of the mechanical and biochemical  
76 irritation of the biliary epithelium by flukes via their suckers, metabolites, and  
77 excretory-secretory products (ESP) [3]. Local inflammation and the systemic  
78 immune response in the host [4-7] produce reactive oxygen species and  
79 reactive nitrogen compounds, which may cause DNA damage, leading to  
80 neoplasms [8, 9].

81 *N*-nitrosodimethylamine (NDMA) is a potent hepatotoxin that can cause  
82 fibrosis and tumors in the liver of rats via the activation of CYP450 enzymes  
83 [10] and hamsters infected with *C. sinensis* are at a greater risk of developing  
84 NDMA-induced or inflammation-mediated CHCA than uninfected hamsters  
85 [11, 12]. Previously, we reported that exposure to NDMA and the ESP of *C.*  
86 *sinensis* increases HEK293T cell proliferation and the proportion of cells in  
87 the G2/M phase [3].

88 CHCA is potentially caused by increased levels of proinflammatory  
89 cytokines and nuclear factor kappa B (NFκB), which regulate the activities of  
90 cyclooxygenase-2 (Cox-2) and inducible nitric oxide synthase, and disturb the  
91 homeostasis of oxidants/anti-oxidants and DNA repair enzymes [13]. ESPs of  
92 *C. sinensis* induce pro-inflammatory responses *in vitro* by the upregulation of  
93 TLR4 and its downstream transduction signals, including MyD88-dependent

94 I $\kappa$ B- $\alpha$  degradation and NF $\kappa$ B activation [14, 15]. NF $\kappa$ B may also influence  
95 the production of Cx43, a gap-junction protein, in liver cirrhosis [16, 17].

96       Gap junctions are clusters of transmembrane channels on the cell  
97 membrane that permit direct intercellular exchange of ions, secondary  
98 messengers, and small signaling molecules influencing cell growth,  
99 differentiation, and cancerous changes [17-21]. Among gap junction proteins,  
100 Cx43 is involved in almost all steps of the inflammatory response of cells,  
101 cytokine production, and inflammatory cell migration [17, 20, 22]. The  
102 substantial role of Cx43 in carcinogenesis is highlighted by the fact that high  
103 levels of Cx-43 expression increase the invasion of breast tumor cells and  
104 promote tumors in melanoma [22].

105       Alterations of Cx expression have been reported in cancer [21, 23]. In  
106 hepatocellular carcinoma (HCC), for instance, reduced Cx32 expression is  
107 accompanied by increased expression of Cx43, which promotes HCC via cell-  
108 to-cell communication [16, 20, 23]. Fujimoto et al. [23] have shown that Cx32  
109 has a suppressive effect in metastatic renal cell carcinoma. However, the role  
110 of connexins in cancer is still controversial [23], and the influence of gap  
111 junctions in CHCA caused by *C. sinensis* has not yet been examined.

112       In this study, to determine the mechanisms underlying the carcinogenic  
113 effects of ESP from *C. sinensis*, we investigated changes in cell proliferation,  
114 proinflammatory molecules, and connexin production in cholangiocytes (H69  
115 cell line) exposed to ESP from *C. sinensis* and the carcinogen NDMA. We

116 found that the silencing of Cx43 reduced ESP- and NDMA-induced cell  
117 proliferation and the expression of Cox-2.

118

## 119 **Methods**

### 120 **Preparation of ESP**

#### 121 **Animals**

122 The animal experimental protocol was approved and reviewed by the  
123 Institutional Animal Care and Use Committee (IACUC) of Seoul National  
124 University Health System, Seoul, Korea (approval no. SNU-060511-1) and  
125 followed the National Institutes of Health (NIH) guideline for the care and use  
126 of laboratory animals (NIH publication no. 85–23, 1985, revised 1996). The  
127 facility is accredited by the Ministry of Food and Drug Administration and by  
128 the Ministry of Education, Science and Technology (LNL08-402) as an  
129 animal experiment facility. Male Sprague–Dawley rats at 6 weeks of age were  
130 purchased from Koatech Co. (Seoul, Korea) and housed in an ABL-2 animal  
131 facility at Seoul National University College of Medicine. All rats were bred  
132 in filter cages under positive pressure according to institutionally approved  
133 guidelines.

134

#### 135 **Recovery of metacercariae of *C. sinensis***

136 *Pseudorasbora parva*, the second intermediate host of *C. sinensis*,  
137 which was naturally infected with *C. sinensis*, was purchased from  
138 Sancheong-gun, Gyeongsangnam-do, Republic of Korea, an endemic  
139 area for clonorchiasis. Metacercariae of *C. sinensis* were collected after  
140 the digestion of fish with pepsin-HCl (0.6%) artificial gastric juice for 1  
141 h at 37°C.

142

143 **Infection of experimental animals with *C. sinensis* and collection of**  
144 **ESP**

145 Sprague–Dawley rats were individually infected orally with 50  
146 metacercariae of *C. sinensis*. Eight weeks post-infection, adult worms  
147 were collected from *bile ducts* and washed several times with  
148 phosphate-buffered saline (PBS). The freshly isolated worms were then  
149 incubated in sterile PBS containing antibiotics for 24 h in an  
150 atmosphere of 5% CO<sub>2</sub> at 37°C. After incubation, the medium was  
151 centrifuged for 10 min at 800 rpm to remove the worms and debris. The  
152 supernatant was then further centrifuged for 10 min at 3000 rpm and  
153 filtered with a syringe-driven 0.45-µm filter unit. The amount of protein  
154 in each extract was measured using the Bradford assay (Thermo,  
155 Rockford, IL, USA). The concentration of endotoxin (LPS) was

156 measured using an LAL QCL-1000 Kit (LONZA, Switzerland), and as  
157 a result, the LPS contained in 10 µg/mL of ESP was measured to be  
158 less than 0.001 (EU). Therefore, there is no effect of LPS on the results  
159 of this paper.

160

## 161 **Cell culture and experimental design**

### 162 **Cell culture**

163 SV40-transformed human cholangiocytes (H69) from Dr. Dae-Gon Kim of  
164 Chonbuk National University for providing were divided into four treatment  
165 conditions and cultured for more than 180 days; the medium was replaced  
166 every 72 h. The cells were then treated as follows: control, cultured in plain  
167 medium; 100 ng/mL NDMA, cultured in medium containing 100 ng/mL  
168 NDMA; ESP, cultured in medium containing 10 µg/mL ESP; and NDMA +  
169 ESP, cultured in medium containing 10 µg/mL NDMA and 100 ng/mL ESP.  
170 H69 cells were cultured in Dulbecco's modified Eagle's medium (DMEM;  
171 Gibco, Carlsbad, CA, USA) and DMEM/F12 supplemented with 10% heat-  
172 inactivated fetal bovine serum (FBS; Gibco), 2 mM L-glutamine, 100 µg/mL  
173 penicillin, 0.243 mg/mL adenine (Sigma, St. Louis, MO, USA; A68626), 5  
174 µg/mL insulin (Sigma; I6634), 10 µg/mL epinephrine (Sigma; E4250), 5  
175 µg/mL Triiodonine-transferrin (Sigma; T8158), 30 ng/mL epidermal growth  
176 factor (R&D Systems, Minneapolis, MN, USA; 236-EG), 1.1 µM



177 hydrocortisone, and 100 U/mL streptomycin at 37°C in a humidified  
178 atmosphere of 5% CO<sub>2</sub>.

179

## 180 **Cell proliferation assay**

181 The PrestoBlue cell viability reagent was utilized to evaluate cell  
182 proliferation. For each assay, cells were seeded at a density of  $5 \times 10^3$   
183 cells/well on 96-well plates. After 24 h of incubation, the medium was  
184 replaced with 2% FBS-DMEM without phenol red. The cells were then  
185 incubated in the presence of PBS (vehicle) or with 100 ng/mL NDMA with or  
186 without 10 µg/mL ESP for another 72 h. The PrestoBlue cell viability reagent  
187 (1 mg/mL) was dissolved in warm medium, and 1.25 mM phenazine  
188 methosulfate (PMS) was prepared in PBS. Following incubation for the  
189 indicated periods, 50 µL of the PrestoBlue cell viability reagent was added to  
190 each well. The plates were then incubated for 1 h. The conversion of  
191 PrestoBlue cell viability reagent was quantified by measuring the absorbance  
192 at 570 and 600 nm using a microtiter plate reader.

193

## 194 **Cell cycle analysis**

195 For the cell cycle analysis, H69 cells were plated in six-well culture  
196 plates at  $2 \times 10^5$  cells/well in 2 mL of DMEM containing 10% FBS. They  
197 were then treated with 100 ng/mL NDMA with or without 10 µg/mL ESP for  
198 72 h and stained with propidium iodide (PI). The PI-stained cells were

199 analyzed using a FACSCalibur multicolor flow cytometer (Becton-Dickinson,  
200 Franklin lakes, NJ, USA), and data were analyzed using CellQuest software  
201 (Becton-Dickinson).

202

### 203 **Western blotting**

204 For western blots, cells were lysed using 1% Nonidet P-40 in a buffer  
205 containing 150 mM NaCl, 10 mM NaF, 1 mM PMSF, 200  $\mu$ M Na<sub>3</sub>VO<sub>4</sub>, and  
206 50 mM HEPES, pH 7.4. Equal amounts of protein were separated by 8% and  
207 10% sodium dodecyl sulfate-polyacrylamide gel electrophoresis (SDS-PAGE)  
208 and transferred to polyvinylidene fluoride (PVDF) membranes (Immobilon;  
209 Millipore, Billerica, MA, USA). The membranes were then probed with  
210 antibodies against E2F1, Ki-67, Ck19, Cox-2, connexin 43, connexin 32,  
211 connexin 26, and calnexin. The primary antibodies were detected using goat  
212 anti-rabbit or rabbit anti-mouse secondary antibodies conjugated with HRP  
213 and visualized using an enhanced chemiluminescence kit (ECL; Amersham  
214 Pharmacia Biotech, North Massapequa, NY, USA). The western blotting  
215 results were obtained by a densitometric analysis using ImageJ (NIH,  
216 Bethesda, MD, USA).

### 217 **Antibodies**

218 Polyclonal or monoclonal antibodies were used to detect the expression  
219 of cell-cycle-related proteins, including anti-E2F1 (sc-193; Santa Cruz

220 Biotechnology, Santa Cruz, CA, USA) and anti-Ki-67 (SP6; Abcam,  
221 Cambridge, MA, USA). The other antibodies included anti-Cox-2 (c-9897;  
222 Cayman Chemicals, Ann Arbor, MI, USA) and anti-cytokeratin-19 (Ab53119;  
223 Abcam) as cancer-related makers, and anti-connexin 26 (138100; Invitrogen,  
224 Carlsbad, CA, USA), anti-connexin 32 (358900; Invitrogen), and anti-  
225 connexin 43 (138300; Invitrogen). An antibody against calnexin (BD 610523)  
226 used as a control was purchased from Transduction Laboratories (BD  
227 Biosciences, San Jose, CA, USA) and used at a 1:1,000 dilution. Anti-mouse,  
228 anti-rabbit, and anti-goat IgG antisera conjugated with horseradish peroxidase  
229 (HRP) were purchased from DAKO (Glostrup, Denmark).

### 230 **Confocal microscopy**

231 Cells were washed with cold PBS three times and fixed with 2%  
232 paraformaldehyde in PBS for 30 min. Permeabilization was performed by  
233 treating the cells with 0.2% (w/v) Triton X-100 in PBS for 5 min and then  
234 blocking with 0.5% BSA in PBS for 1 h. After blocking, the cells were  
235 incubated with primary antibodies against connexin 26, 32, and 43 (Invitrogen)  
236 diluted in BSA-PBS at 25°C for 2 h and then incubated in secondary  
237 antibodies diluted in BSA-PBS at room temperature for 30 min. After  
238 washing with 1× PBS, the cells were stained with DAPI and observed under a  
239 confocal laser scanning microscope (LSM PASCAL; Carl Zeiss, Jena,  
240 Germany).

241

## 242 **Cx43 silencing with siRNA**

243 Three selected human Cx43-siRNAs (TriFECTa Kit disRNA Duplex,  
244 IDT, San Jose, CA, USA), with negative and positive controls, and specific  
245 siRNA targeting connexin 43 (NM-00165) (Table 1) were purchased from  
246 IDT. The transfection experiments were performed using the TransIT-TKO  
247 Kit (Mirus, Madison, WI, USA) following the manufacturer's instructions.  
248 Briefly, a 25 nM siRNA solution was mixed with 10  $\mu$ L of TransIT-TKO and  
249 added to the wells of a 6-well plate containing  $2 \times 10^5$  H69 cells for 72 h.  
250 Cells were then treated with NDMA, ESP of *C. sinensis*, or the combination  
251 for 72 h. Medium and cells (rinsed 2 times with ice-cold PBS) were harvested  
252 3 days later. The efficiency of transfection was assessed by measuring the  
253 expression of gap junction proteins (connexin 26, connexin 32, and connexin  
254 43) by real-time PCR.

255 Table 1. Connexin43-specific siRNA oligonucleotide sequences

| <b>Oligonucleotide name</b> | <b>Oligonucleotide sequences</b>  |
|-----------------------------|-----------------------------------|
| <b>Connexin 43 Duplex</b>   | 5'-AGCGUUUGCUAUGACCAAUUCUCC-3'    |
| <b>Sequences</b>            | 3'-UGUCGCAAACGAUACUGGUUAAGAAGG-5' |
| <b>Endogenous Gene</b>      | 5'-GCCAGACUUUGUUGGAUUUGAAATT-3'   |
| <b>Positive Control</b>     | 3'-AAUUUCAAUCCAACAAAGUCUGGCUU-5'  |
| <b>Negative Control</b>     | 5'-CGUUAUUCGCGUAUAAUACGCGUAT-3'   |

---

3'-AUACGCGUAUUAUACGCGAUUAACGAC-5'

---

256

257 **Real-time PCR**

258 RNA samples from each cell line were column-purified using the  
259 RNeasy Mini Kit (Qiagen, Hilden, Germany). Reverse transcription and real-  
260 time PCR (RT-PCR) were performed to determine the mRNA expression  
261 levels of *Cx26*, *Cx32*, *Cx43*, and *Cox-2*, using *GAPDH* as a control (Applied  
262 Biosystems, Santa Clara, CA, USA). The thermal cycling parameters for  
263 reverse transcription were modified according to the Applied Biosystems  
264 manual. Hexamer incubation at 25°C for 10 min and reverse transcription at  
265 42°C for 30 min was followed by reverse transcriptase inactivation at 95°C  
266 for 5 min. cDNA (20 ng) from the previous step was subjected to RT-PCR  
267 using specific sets of primers (Table 2 in a total reaction volume of 25 µL  
268 (Applied Biosystems). RT-PCR was performed in an optical 96-well plate  
269 using an ABI PRISM 7900 HT Sequence Detection System (Applied  
270 Biosystems) and TaqMan probe detection chemistry. The running protocol  
271 was as follows: initial denaturation at 95°C for 10 min, and 40 cycles of  
272 amplification at 95°C for 15 s and 60°C for 1 min. After PCR, a dissociation  
273 curve was constructed by increasing the temperature from 65°C to 95°C to  
274 evaluate the PCR amplification specificity. The cycle threshold (Ct) value was  
275 recorded for each sample.

276 Table 2. Oligonucleotide primers and detection probe for real-time PCR

| <b>Oligonucleotide name</b> | <b>Oligonucleotide sequences</b>                            |
|-----------------------------|-------------------------------------------------------------|
| <b>Connexin 26</b>          |                                                             |
| <b>GJB2 F</b>               | CCC CTA AAG CCT CAA AAC AAA G                               |
| <b>GJB2 R</b>               | GAA ACA AAT GCC GAT ATC CTC TG                              |
| <b>GJB2 probe</b>           | 56-FAM/CCT TAC ACC /ZEN/AAT AAC CCC TAA CAG CCT<br>/3IABkFQ |
| <b>Connexin 32</b>          |                                                             |
| <b>GJB1 F</b>               | GCA CAG ACA TGA GAC CAT AGG                                 |
| <b>GJB1 R</b>               | CAA ACC TGT CCA GTT CAT CCT                                 |
| <b>GJB1 probe</b>           | 56-FAM/CCT ATC CCT /ZEN/GAG GCC ACC CAG /3IABkFQ            |
| <b>Connexin 43</b>          |                                                             |
| <b>GJA1 F</b>               | ACT TGG CGT GAC TTC ACT AC                                  |
| <b>GJA1 R</b>               | AGC AGT TGA GTA GGC TTG AAC                                 |
| <b>GJA1 probe</b>           | 56-FAM/AGG CAA CAT /ZEN/GGG TGA CTG GAG C/3IABkFQ           |
| <b>Cox-2</b>                |                                                             |
| <b>PTGS2 F</b>              | ACT TGG CGT GAC TTC ACT AC                                  |
| <b>PTGS2 R</b>              | AGC AGT TGA GTA GGC TTG AAC                                 |
| <b>PTGS2 probe</b>          | /56-FAM/AGG CAA CAT /ZEN/GGG TGA CTG GAG<br>C/3IABkFQ/      |
| <b>GAPDH</b>                |                                                             |

---

|                    |                                                        |
|--------------------|--------------------------------------------------------|
| <b>GAPDH F</b>     | ACA TCG CTC AGA CAC CAT G                              |
| <b>GAPDH R</b>     | TGT AGT TGA GGT CAA TGA AGG G                          |
| <b>GAPDH probe</b> | 5HEX/AAG GTC GGA /ZEN/GTC AAC GGA TTT GGT<br>C/3IABkFQ |

---

277

## 278 **Statistical analysis**

279 Statistical significance was analyzed using Student's *t*-tests. Differences were  
280 considered statistically significant at a \**P* < 0.05, \*\**P* < 0.01 and \*\*\**P* <  
281 0.001 versus control. Data are presented as the mean ± standard error of the  
282 mean (SEM) from at least three independent experiments.

283

## 284 **Results**

285

### 286 **ESP and NDMA synergistically increase H69 cell proliferation**

287 The roles of NDMA and ESP in the proliferation of H69 cells, as  
288 determined by cell viability, were investigated. Proliferation was higher in  
289 H69 cells treated with NDMA and ESP of *C. sinensis* than in control cells.  
290 Compared to control cells, the average increase for cells treated with NDMA  
291 was 112%, for cells treated with ESP was 120% (*P* < 0.05), and for cells  
292 treated with NDMA + ESP was 146% (*P* < 0.001). NDMA and ESP had  
293 synergistic effects on cell proliferation (Fig 1A).

294

295 **Fig 1: Effects of NDMA and ESP of *C. sinensis* on cell proliferation and**  
296 **cell cycle progression in human cholangiocytes (H69 cells).** A. Cells were  
297 plated in 96-well plates ( $5 \times 10^3$  cells/well). Cell proliferation for each  
298 treatment was determined using the PrestoBlue cell viability assay. B. After  
299 H69 cells were treated with NDMA and ESP for 72 h, PI staining was  
300 performed to determine the percentage of cells in each phase. Data represent  
301 the mean  $\pm$  SE of five independent experiments. \* $P < 0.05$ , \*\* $P < 0.01$  and  
302 \*\*\* $P < 0.001$  versus control.

303

### 304 **Cell cycle distribution upon NDMA and/or ESP treatment in H69** 305 **cells**

306 Cell cycle progression was monitored using propidium iodide (PI)  
307 staining (Fig 1B). In H69 cells treated with NDMA, ESP, or NDMA + ESP  
308 for 72 h, the number of cells in the G0/G1 phase significantly decreased, but  
309 cells in the G2/M phase increased significantly compared to cell counts in the  
310 control group (Fig 1B). Fewer S-phase cells were identified in the ESP- and  
311 NDMA + ESP-treated cells than in control cells. There is no significant  
312 increase in G2/M phase in cells treated with NDMA compared to control  
313 group (Fig 1B). The proportions of G2/M-phase cells in each condition were  
314 as follows: control, 17%; NDMA, 20%; ESP, 26%; NDMA + ESP, 37% ( $P =$   
315 0.007).

316



317 **Upregulation of inflammation- or transformation-related proteins**  
318 **by NDMA and ESP in H69 cells**

319 Immunoblotting was utilized to detect the regulation of cell-cycle-related  
320 proteins in each group using calnexin as a loading control. The expression  
321 levels of several cell proliferation- and inflammation-related proteins,  
322 including E2F1, Ki-67, Cy-19, and Cox-2 (an essential regulator of the G2/M  
323 transition), were upregulated, especially in NDMA + ESP-treated cells (Fig 2).  
324

325 **Fig 2: Expression of inflammation- or transformation-related proteins in**  
326 **H69 cells after treatment with NDMA and ESP, assessed by western**  
327 **blotting.** H69 cells were incubated with PBS (vehicle), NDMA, ESP, or both  
328 for 72 h. The cells were collected for protein extraction. The blots of each  
329 groups were run under same experimental conditions and the images were  
330 cropped from different parts of the same gels, DATA represent the mean  $\pm$  SE  
331 of five independent experiments. \* $P < 0.05$ , \*\* $P < 0.01$  and \*\*\* $P < 0.001$   
332 versus control.  
333

334 **Gap junction proteins in H69 cells**

335 The expression levels of Cx26 and Cx43 were high in NDMA + ESP-  
336 treated cells, as confirmed by immunoblotting (Fig 3). The intracellular  
337 concentrations of Cx26 and Cx43 in each condition were observed under a  
338 confocal microscope. Western blotting indicated increases in Cx26 and Cx43

339 expression in cells treated with ESP and NDMA + ESP (Figs 3). The  
340 expression of Cx32 (blue) was markedly lower in cells treated with NDMA +  
341 ESP than in other cells. Immunofluorescence confocal microscopy indicated  
342 that the intracellular concentrations of Cx26 (green) and Cx43 (green)  
343 increased in cells treated with NDMA + ESP (Fig 4).

344

345 **Fig 3: Expression of the gap-junction proteins connexin 26, connexin 32,**  
346 **and connexin 43 in H69 cells after treatment with NDMA and/or ESP, as**  
347 **determined by western blotting.** H69 cells were incubated with either PBS  
348 (vehicle) or NDMA and/or ESP for 72 h, and the cells were collected for  
349 protein extraction. The blots of each groups were run under same  
350 experimental conditions and the images were cropped from different parts of  
351 the same gels, DATA represent the mean  $\pm$  SE of five independent  
352 experiments. \* $P < 0.05$ , \*\* $P < 0.01$  and \*\*\* $P < 0.001$  versus control.

353

354 **Fig 4: Concentration of intracellular connexin 26, connexin 32, and**  
355 **connexin 43 in human cholangiocytes (H69 cells).** After treatment with  
356 NDMA and ESP for 72 h, the concentration of intracellular connexin 26 in  
357 H69 cells was measured by laser scanning microscopy ( $\times 4,000$ ). Scale bar =  
358 25  $\mu\text{m}$ . Data represent the mean  $\pm$  SE of five independent experiments. \* $P <$   
359 0.05, \*\* $P < 0.01$  and \*\*\* $P < 0.001$  versus control.

360

361 **Reduced cell proliferation upon NDMA and ESP treatment in H69**  
362 **cells by Cx43 silencing compare to silencing negative control.**

363 Downregulation of Cx43 by Cx43-specific small interfering RNA  
364 resulted in all groups were not significant, even though NDMA and ESP  
365 stimulated cells. The average increases compared to the control were as  
366 follows: NDMA, 104.5%; ESP, 105.1%; and NDMA + ESP, 107.6% (Fig 5A).

367

368 **Fig 5: Effect of connexin 43 silencing in H69 cells. A.** Reduced cell  
369 proliferation upon NDMA and ESP treatment in H69 cells by connexin 43  
370 silencing. **B.** Uptake of Cx43 siRNA reduces *Cx43* expression, as confirmed  
371 by real-time PCR. *Cx43* expression was remarkably reduced in H69 cells  
372 transfected with *Cx43*-specific siRNA. **C.** Ratio of *Cx26/GAPDH* in H69 cells  
373 transfected with *Cx43*-specific siRNA. *Cx26* expression was remarkably  
374 reduced in H69 cells transfected with *Cx43*-specific siRNA. **D.** The ratio of  
375 *Cox-2/GAPDH* in H69 cells transfected with *Cx43*-specific siRNA. *Cox-2*  
376 expression was remarkably reduced in H69 cells transfected with *Cx43*-  
377 specific siRNA. Data represent the mean  $\pm$  SE of five independent  
378 experiments. \* $P < 0.001$  versus control siRNA.

379

380 **Downregulation of Cx43 by Cx43-specific small interfering RNA**  
381 **reduced the expression of Cx26 and Cox-2 in H69 cells**

382 To evaluate the effect of Cx43 downregulation on the expression of other

383 gap junction proteins and Cox-2, H69 cells were harvested after treatment  
384 with NDMA and ESP of *C. sinensis* for 72 h. Transfection with Cx43 siRNA  
385 resulted in a reduction in *Cx43* expression of greater than 70% when  
386 compared with that of the liposome-only control (Fig 5A). Real-time PCR  
387 showed that Cx43 silencing resulted in the downregulation of *Cx26* and *Cox-2*  
388 (Figs 5C and 5D, respectively). However, *Cx32* expression was not affected  
389 (not shown).

390

## 391 **Discussion**

392 Our results provided the first evidence for the involvement of gap  
393 junction proteins in the pathogenesis of CHCA by *C. sinensis*. NDMA and  
394 ESP of *C. sinensis* increased Cx43 expression substantially in H69 human  
395 cholangiocytes. In addition, in the presence of ESP and NDMA stimulation,  
396 *Cx43* knockdown inhibited *Cox-2* expression in H69 cells. Yan et al. [15]  
397 reported that iNOS is highly expressed in Kupffer cells, sinusoidal endothelial  
398 cells, and biliary epithelial cells in BALB/c mice after *C. sinensis* infection.  
399 Nitric oxide (NO) formation and nitrosation may contribute to the  
400 development of *C. sinensis*-associated carcinogenesis [11, 12, 14, 15]. The  
401 induction of iNOS under inflammatory conditions suggests that NO is  
402 involved in the upregulation of *Cx43* [16, 19]. Therefore, we also expect the  
403 involvement of iNOS in the elevation of *Cx43* expression under inflammatory  
404 conditions in the present *C. sinensis* model. Further studies are warranted to

405 test this hypothesis.

406 Our results indicated that ESP of *C. sinensis* and NDMA had a synergistic  
407 effect on the proliferation of human cholangiocytes (Fig 1). In addition to the  
408 observed increase in cell proliferation and alteration of the cell cycle, the  
409 expression of the gap junction proteins Cx43 and Cx26 increased in H69 cells  
410 treated with NDMA and ESP. Most normal cells have functional gap  
411 junctional intercellular communication, in contrast to the dysfunctional  
412 communication of cancer cells [17-22]. When used in combination with  
413 NDMA, ESP of *C. sinensis* induced cell proliferation and increased the  
414 expression of E2F1, Ck19, and Ki-67. When H69 cells were co-stimulated  
415 with NDMA and ESP, cell proliferation increased. Additionally, as shown in  
416 Fig 1B, treatment with NDMA + ESP maximized the proportion of cells in  
417 the G2/M phase, implying that NDMA and ESP synergistically stimulate cell  
418 cycle progression. We analyzed the expression of a number of cell  
419 proliferation-, cell cycle-, and inflammation-related proteins (Fig 2), including  
420 E2F1, Ki-67, and Cy19 [24-26]. E2F1 is able to induce cell cycle progression,  
421 resulting in cell proliferation [3, 24]. Consistent with these previous findings,  
422 we observed that increased expression of E2F1 stimulated cell proliferation.  
423 C-Met is involved in early events of carcinogenesis, and Ki-67 is involved in  
424 the formation of invasive carcinoma [25-28]. Biliary epithelial cells retain  
425 Cy19 expression after neoplastic transformation in almost all cases [26, 28].  
426 In our study, Cy19 and Ki-67 were upregulated in response to the stimulation

427 of H69 cell proliferation.

428 Cyclooxygenase 2 (Cox-2), an enzyme involved in the production of  
429 prostaglandins, was over-expressed when cells were stimulated by NDMA  
430 and ESP. Cox-2 over-expression has been observed in various inflammatory  
431 diseases and in bile duct carcinoma cells, mainly in the cytoplasm [29-30].  
432 Importantly, bile duct epithelial cells in primary sclerosing cholangitis show  
433 very strong Cox-2 expression, comparable to that in carcinoma cells. In  
434 contrast, epithelial cells in primary biliary cirrhosis show moderate levels of  
435 Cox-2 expression [29, 30]. In this context, the over-expression of Cy19, Ki-67,  
436 and Cox-2 may result in the transformation of normal H69 cells to cancer-like  
437 cells by stimulation with NDMA and ESP of *C. sinensis*. In the present study,  
438 Cx43 and Cx26 expression levels were increased in H69 cells upon  
439 stimulation with NDMA and ESP of *C. sinensis*. In contrast, Cx32 was  
440 significantly downregulated. Increased expression of hepatic Cx43 was noted  
441 in cirrhosis and in a mouse model of acute-on-chronic liver failure in response  
442 to LPS, and this effect was related to the severity of inflammation [19]. This  
443 increased Cx43 expression was likely an adaptive protective response of the  
444 liver to enable better cell-to-cell communication [16, 20, 21]. The expression  
445 levels of Cx26 and Cx32, major connexins in the liver, are extremely low in  
446 several HCC lines, but Cx43, a minor connexin in the liver, is highly  
447 expressed in metastatic cancer [17, 20-22]. Cx43 knockdown using siRNA  
448 reduced cell proliferation and significantly suppressed the expression of Cx26

449 and Cox-2 in H69 cells stimulated with NDMA and ESP compare to silencing  
450 negative control stimulated with NDMA and ESP. The connexin proteins  
451 Cx43 and Cx26 are involved in cell modification upon stimulation by NDMA  
452 and ESP of *C. sinensis*.

453 In general, cells contain several known connexins, classified according to  
454 their intracellular location (Table 3).

455 Table 3. Full spectrum of connexins expressed in rodent and human livers

| <b>Connexins</b>     | <b>Localization</b> | <b>References</b>          |
|----------------------|---------------------|----------------------------|
| <b>Cx26</b>          | HP, KC, SC, SEC     | Nicholson et al. (1987)    |
|                      |                     | Zhang and Nicholson (1989) |
| <b>Cx31.9/Cx30.2</b> | NS                  | Belluardo et al. (2001)    |
|                      |                     | Nielsen and Kumar (2003)   |
| <b>Cx32</b>          | HP, BEC, SEC        | Bode et al. (2002)         |
|                      |                     | Kumar and Gilula (1986)    |
|                      |                     | Nicholson et al. (1987)    |
|                      |                     | Paul (1986)                |
| <b>Cx37</b>          | AEC, PEC            | Chaytor et al. (2001)      |
|                      |                     | Saito et al. (2000)        |
|                      |                     | Shiojiri et al. (2006)     |
|                      |                     | Willecke et al. (1991)     |
| <b>Cx39</b>          | NS                  | Cicirata et al. (2004)     |

|             |                                   |                        |
|-------------|-----------------------------------|------------------------|
| <b>Cx40</b> | AEC, PEC                          | Chaytor et al. (2001)  |
|             |                                   | Shiojiri et al. (2006) |
| <b>Cx43</b> | AEC, BEC, GC, KC, PEC,<br>SC, SEC | Berthoud et al. (1992) |
|             |                                   | Bode et al. (2002)     |
|             |                                   | Chaytor et al. (2001)  |
|             |                                   | Shiojiri et al. (2006) |

456 AEC, hepatic artery endothelial cell; BEC, biliary epithelial cell;  
457 GC, Glisson's capsule; HP, hepatocyte; KC, Kupffer cell; NS, not specified;  
458 PEC, portal vein endothelial cell; SC, stellate cell; SEC, sinusoidal endothelial cell.  
459 Intercellular communication via gap junctions is inhibited by increased Cox-  
460 2 expression, as is frequently observed in several forms of human  
461 malignancies [29, 30]. Recently, several reports have suggested that the  
462 carcinogenic mechanisms of hydrogen peroxide, TPA, and quinones may be  
463 involved in the inhibition of GJIC by Cx43 phosphorylation via ERK1/2  
464 activation in rat liver epithelial cells [13, 17]. Furthermore, increased  
465 expression of Cx43 is positively correlated with NFκB activation in muscular  
466 arteries of patients undergoing coronary artery bypass graft surgery [31].  
467 NFκB plays a central role in general inflammatory and immune responses.  
468 The 5'-flanking region of the *Cox-2* promoter contains an NFκB binding site,  
469 and NFκB is a critical regulator of Cox-2 expression in many cell lines [13,  
470 31]. Taken together, the present findings suggest that Cx43 expression



471 induces Cox2 over-expression via NFκB activation. However, until now, the  
472 link between NFκB activation, Cx43 expression, and Cox2 over-expression  
473 has not been clearly established. In the future, it will be interesting to examine  
474 the relationship between the GJIC and NFκB activation, Cox-2 by ESP of *C.*  
475 *sinensis* and NDMA.

476 In conclusion, our results suggest that Cx43 plays a key role in cell  
477 proliferation, potentially leading to CHCA development upon stimulation by  
478 ESP of *C. sinensis* and NDMA.

479

## 480 **Acknowledgments**

481 We thank Professor Dae-Gon Kim of Chonbuk National University for  
482 providing H69 cells. We would like to thank Professor Sung-Jong Hong and  
483 Fuhong Dai, Department of Medical Environmental Biology, Chung-Ang  
484 University College of Medicine, for providing adult worms of *C. sinensis*.

485

486

## 487 **References**

- 488 [1] Bouvard V, Barn R, Straif K, Grosse Y, Secretan B, El Ghissassi F, et al.  
489 A review of human carcinogens-Part B: biological agents. *Lancet Oncol.*  
490 2009;10: 321–322.
- 491 [2] Kim EM, Kim JL, Choi SY, Kim JW, Kim S, Choi MH, et al. *Infection*

- 492 status of freshwater fish with metacercariae of *Clonorchis sinensis* in  
493 Korea. Korean J Parasitol. 2008;46: 247-251.
- 494 [3] Kim EM, Kim JS, Choi MH, Hong ST, Bae YM. Effects of  
495 excretory/secretory products from *Clonorchis sinensis* and the carcinogen  
496 dimethylnitrosamine on the proliferation and cell cycle modulation of  
497 human epithelial HEK293T cells. Korean J Parasitol. 2008;46: 127-132.
- 498 [4] Kim EM, Bae YM, Choi MH, Hong ST. Cyst formation, increased anti-  
499 inflammatory cytokines and expression of chemokines support for  
500 *Clonorchis sinensis* infection in FVB mice. Parasitol Int. 2012;61: 124-129.
- 501 [5] Kim EM, Yu HS, Jin Y, Choi MH, Bae YM, Hong ST. Local immune  
502 response to primary infection and re-infection by *Clonorchis sinensis* in  
503 FVB mice. Parasitol Int. 2017;66: 436-442.
- 504 [6] Kim EM, Kwak YS, Yi MH, Kim JY, Sohn WM, Yong TS. *Clonorchis*  
505 *sinensis* antigens alter hepatic macrophage polarization in vitro and in vivo.  
506 PLoS Negl Trop Dis. 2017;24: 11.
- 507 [7] Hong ST, Fang Y. *Clonorchis sinensis* and clonorchiasis, an update.  
508 Parasitol Int. 2012;61: 17-24.
- 509 [8] Pinlaor S, Hiraku Y, Ma N, Yongvanit P, Semba R, Oikawa S, et al.  
510 Mechanism of NO-mediated oxidative and nitrative DNA damage in  
511 hamsters infected with *Opisthorchis viverrini*: a model of inflammation-  
512 mediated carcinogenesis. Nitric Oxide. 2004;11: 175-183.
- 513 [9] Yongvanit P, Pinlaor S, Bartsch H. Oxidative and nitrative DNA damage:

- 514 key events in opisthorchiasis-induced carcinogenesis. *Parasitol*  
515 *Int.* 2012;61: 130-135.
- 516 [10] George J, Murray M, Byth K, Farrell GC. Differential alterations of  
517 cytochrome P450 proteins in livers from patients with severe chronic liver  
518 disease. *Hepatology.* 1995;2: 120-128.
- 519 [11] Lee JH, Rim HJ, Bak UB. Effect of *Clonorchis sinensis* infection and  
520 dimethylnitrosamine administration on the induction of  
521 cholangiocarcinoma in Syrian golden hamsters. *Korean J Parasitol.*  
522 1993;31: 21-30.
- 523 [12] Uddin MH, Choi MH, Kim WH, Jang JJ, Hong ST. Involvement of  
524 PSMD10, CDK4, and tumor suppressors in development of intrahepatic  
525 cholangiocarcinoma of syrian golden hamsters induced by *Clonorchis*  
526 *sinensis* and *N*-nitrosodimethylamine. *PLoS Negl Trop Dis.* 2015;9:  
527 e000400.
- 528 [13] Surh YJ, Lee JY, Choi KJ, Ko SR. Effects of selected ginsenosides on  
529 phorbol ester-induced expression of cyclooxygenase-2 and activation of  
530 NF-kappaB and ERK1/2 in mouse skin. *Ann N Y Acad Sci.* 2002;973:  
531 396-401.
- 532 [14] Yan C, Wang YH, Yu Q, Cheng XD, Zhang BB, Li B, et al. *Clonorchis*  
533 *sinensis* excretory/secretory products promote the secretion of TNF-alpha  
534 in the mouse intrahepatic biliary epithelial cells via Toll-like receptor 4.  
535 *Parasit Vectors.* 2015;8: 559.

- 536 [15] Yan C, Li B, Fan F, Du Y, Ma R, Cheng XD, et al. The roles of Toll-like  
537 receptor 4 in the pathogenesis of pathogen-associated biliary fibrosis  
538 caused by *Clonorchis sinensis*. Sci Rep. 2017;7: 3909.
- 539 [16] Balasubramaniyan V, Dhar DK, Warner AE, Vivien Li WY, Amiri AF,  
540 Bright B, et al. Importance of Connexin-43 based gap junction in cirrhosis  
541 and acute-on-chronic liver failure. J Hepatol. 2013;58: 1194-1200.
- 542 [17] Chaytor AT, Martin PE, Edwards DH, Griffith TM. Gap junctional  
543 communication underpins EDHF-type relaxations evoked by ACh in the  
544 rat hepatic artery. Am. J Physiol Heart Circ Physiol. 2001;280: H2441-  
545 H2450.
- 546 [18] Saito T, Krutovskikh V, Marion MJ, Ishak KG, Bennett WP, Yamaskai H.  
547 Human hemangiosarcomas have a common polymorphism but no  
548 mutations in the connexin37 gene. Int J Cancer. 2000;86: 67-70.
- 549 [19] Li K, Yao J, Shi L, Sawada N, Chi Y, Yan Q, et al. Reciprocal regulation  
550 between proinflammatory cytokine-induced inducible NO synthase (iNOS)  
551 and connexin43 in bladder smooth muscle cells. J Biol Chem. 2011;286:  
552 41552-41562.
- 553 [20] Vinken M, De Kock J, Oliveira AG, Menezes GB, Cogliati B, Dagli ML,  
554 et al. Modifications in connexin expression in liver development and  
555 cancer. Cell Commun Adhes. 2012;19: 55-62.
- 556 [21] Bode HP, Wang L, Cassio D, Leite MF, St-Pierre MV, Hirata K, et  
557 al. Expression and regulation of gap junctions in rat

- 558        cholangiocytes. *Hepatology*. 2002;36: 631-640.
- 559 [22] Villares GJ, Dobroff AS, Wang H, Zigler M, Melnikova VO, Huang L, et  
560        al. Overexpression of protease-activated receptor-1 contributes to  
561        melanoma metastasis via regulation of connexin 43. *Cancer Res*. 2009;15:  
562        6730-6737.
- 563 [23] Fujimoto E, Sato H, Nagashima Y, Negishi E, Shirai S, Fukumoto K, et al.  
564        A Src family inhibitor (PP1) potentiates tumor-suppressive effect of  
565        connexin 32 gene in renal cancer cells. *Life Sci*. 2005;76: 2711-2720.
- 566 [24] Zhu W, Giangrande PH, Nevins JR. E2Fs link the control of G1/S and  
567        G2/M transcription. *EMBO J*. 2004;23: 4615-4626.
- 568 [25] Sanada Y, Osada S, Tokuyama Y, Tanaka Y, Takahashi T, Yamaguchi K,  
569        et al. Critical role of c-Met and Ki-67 in progress of biliary carcinoma. *Am*  
570        *Surg*. 2010;76: 372-379.
- 571 [26] Chatzipantelis P, Lazaris AC, Kafiri G, Papadimitriou K, Papatomas TG,  
572        Nonni A, et al. Cytokeratin-7, cytokeratin-19, and c-Kit: Immunoreaction  
573        during the evolution stages of primary biliary cirrhosis. *Hepatol Res*.  
574        2006;363: 182-187.
- 575 [27] Tan XP, Zhang Q, Dong WG, Lei XW, Yang ZR. Upregulated expression  
576        of Mina53 in cholangiocarcinoma and its clinical significance. *Oncol Lett*.  
577        2012;3: 1037-1041.
- 578 [28] Aishima S, Nishihara Y, Kuroda Y, Taguchi K, Iguchi T, Taketomi A, et  
579        al. Histologic characteristics and prognostic significance in small

580 hepatocellular carcinoma with biliary differentiation: subdivision and  
581 comparison with ordinary hepatocellular carcinoma. *Am J Surg Pathol.*  
582 2007;31: 783-791.

583 [29] Hayashi N, Yamamoto H, Hiraoka N, Dono K, Ito Y, Okami J, et al.  
584 Differential expression of cyclooxygenase-2 (COX-2) in human bile duct  
585 epithelial cells and bile duct neoplasm. *Hepatology.* 2001;34: 638-650.

586 [30] Lee KW, Chun KS, Lee JS, Kang KS, Surh YJ, Lee HJ. Inhibition of  
587 cyclooxygenase-2 expression and restoration of gap junction intercellular  
588 communication in H-ras-transformed rat liver epithelial cells by caffeic  
589 acid phenethyl ester. *Ann N Y Acad Sci.* 2004;1030: 501-507.

590 [31] Li JY, Lai YJ, Yeh HI, Chen CL, Sun S, Wu SJ, et al. Atrial gap junctions,  
591 NF-kappaB and fibrosis in patients undergoing coronary artery bypass  
592 surgery: the relationship with postoperative atrial fibrillation. *Cardiology.*  
593 2009;112: 81-88.

594

A.

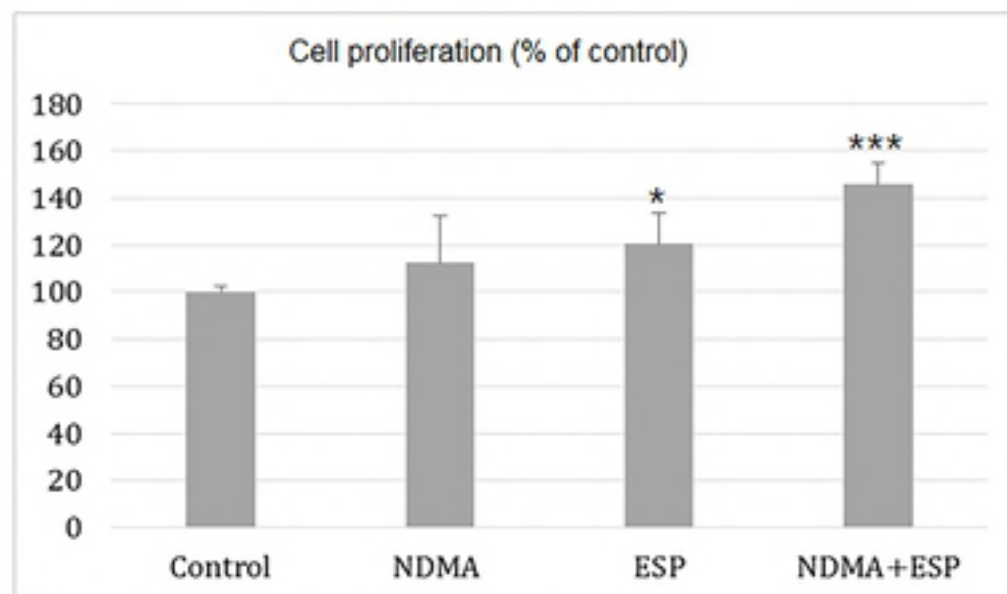

B.

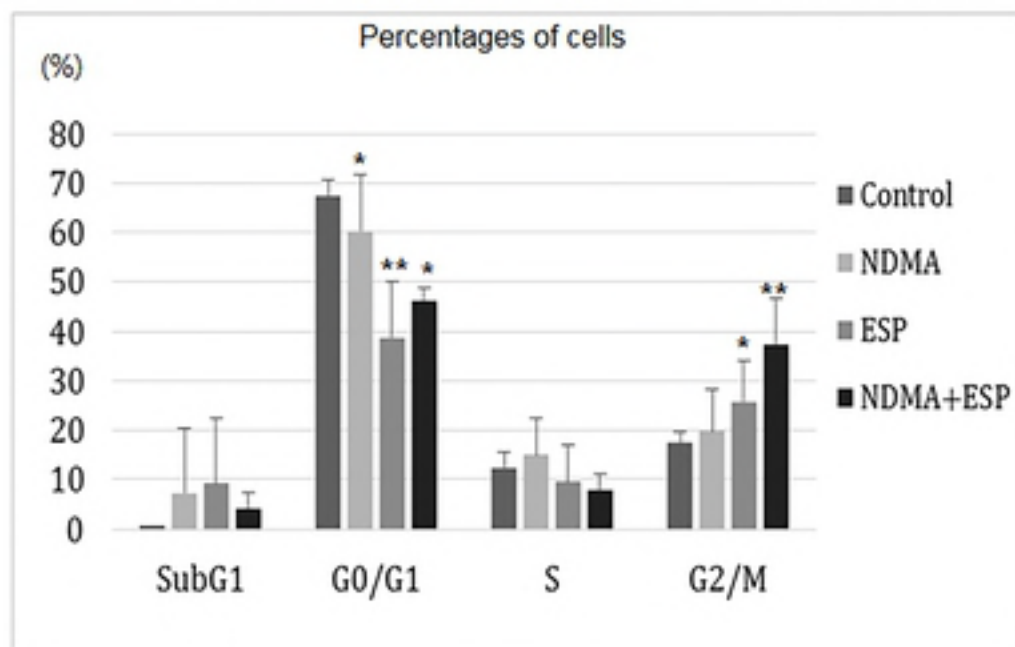

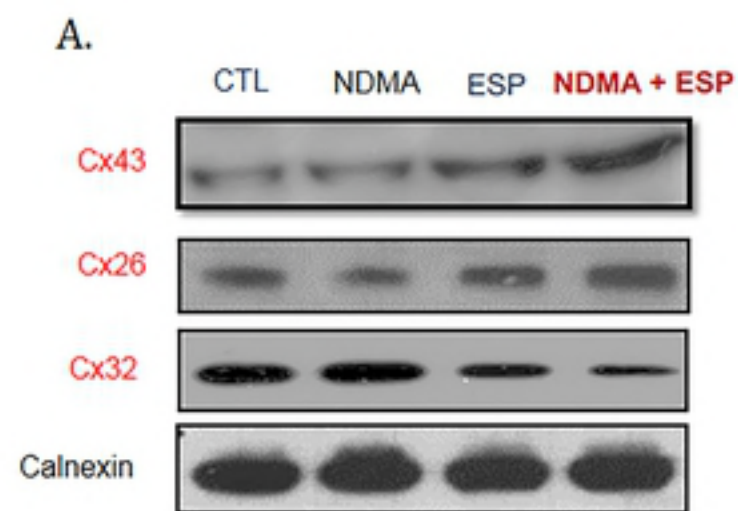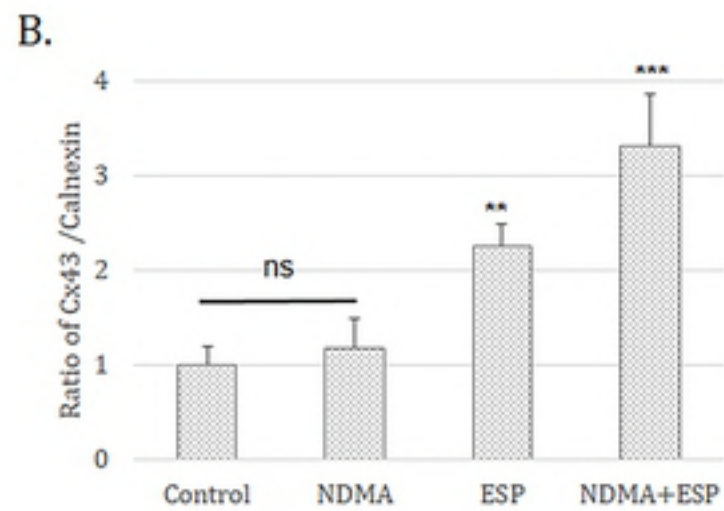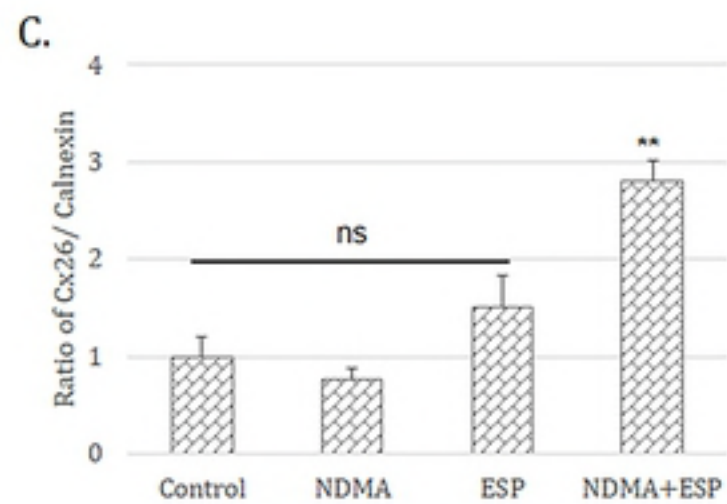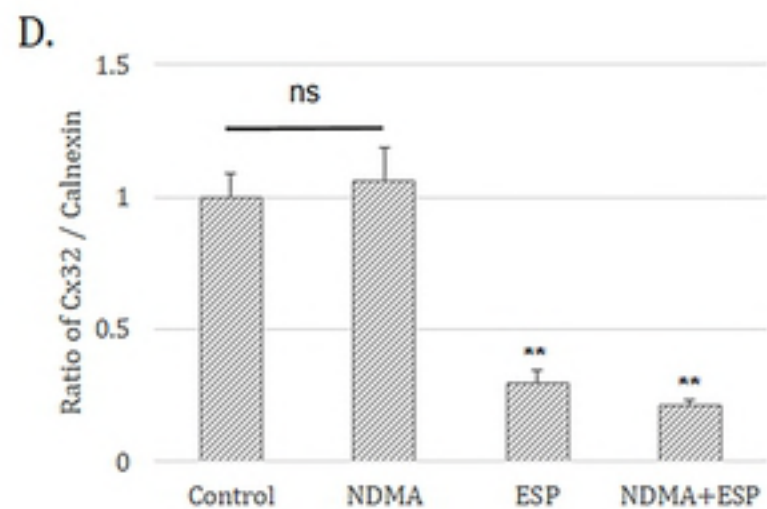



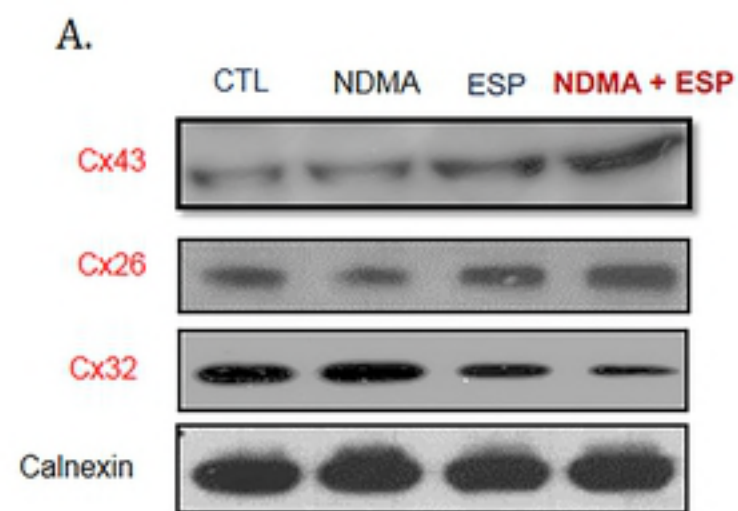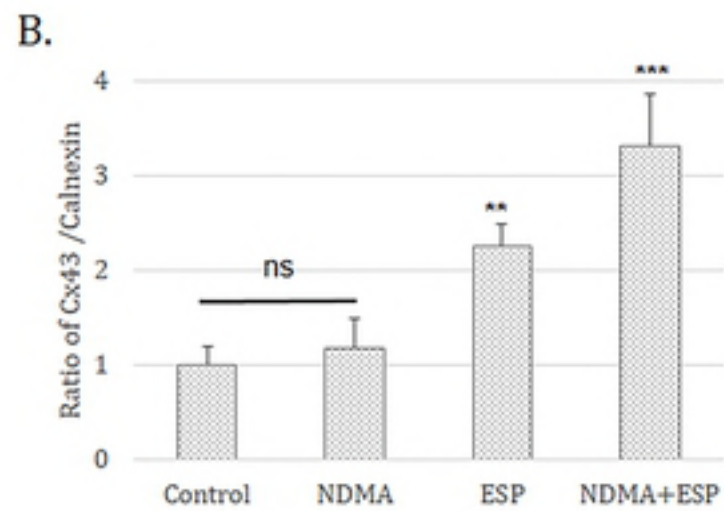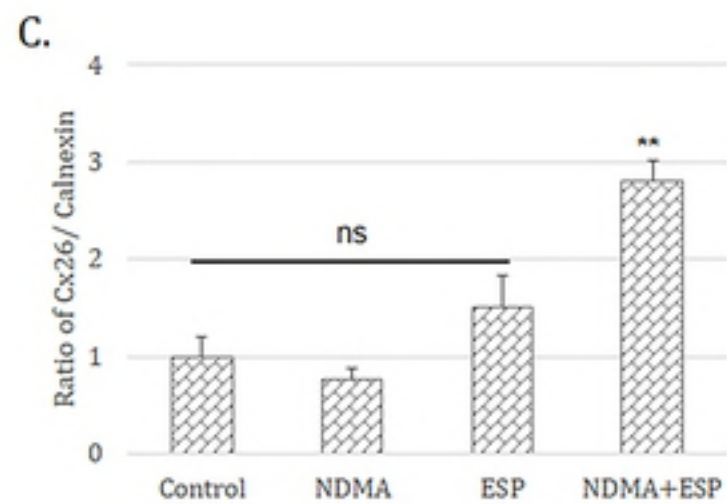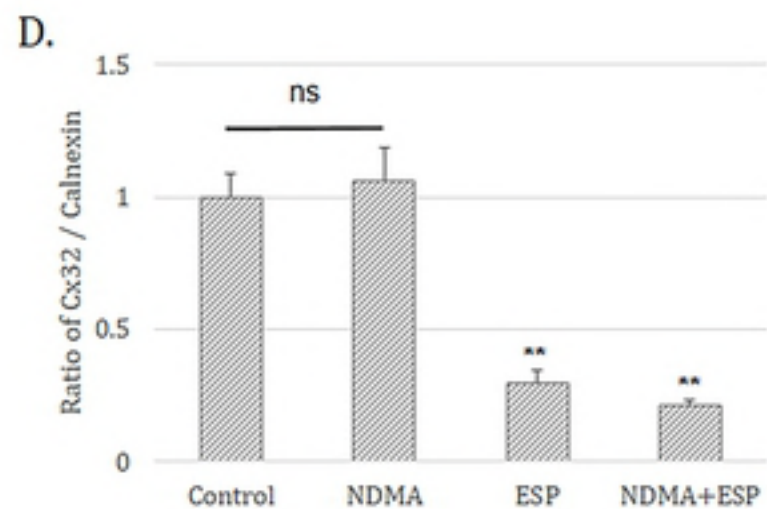

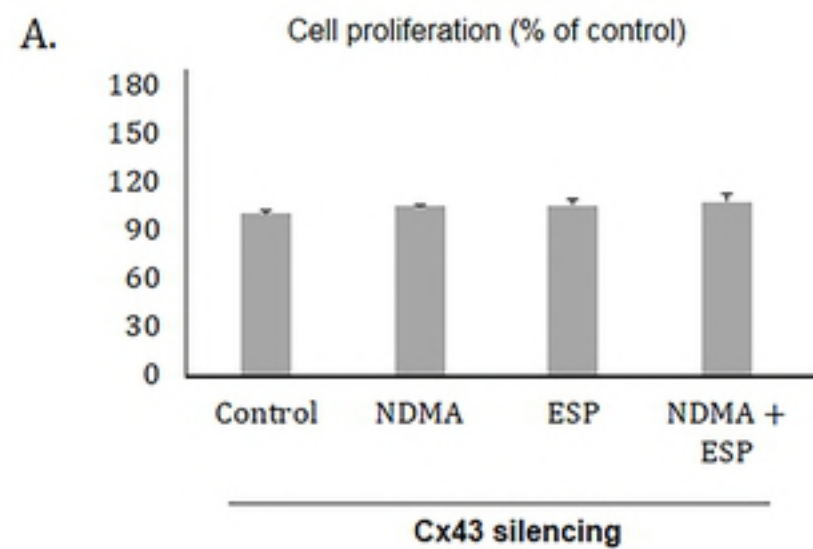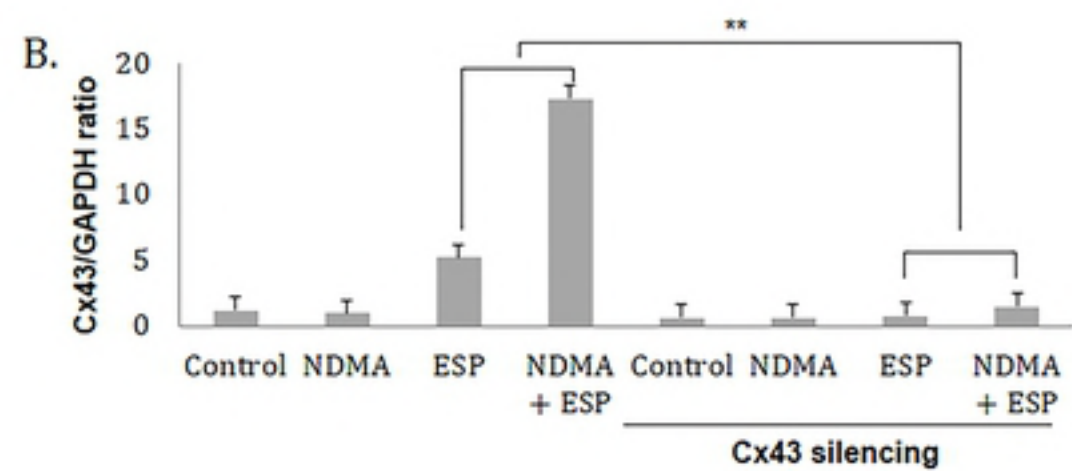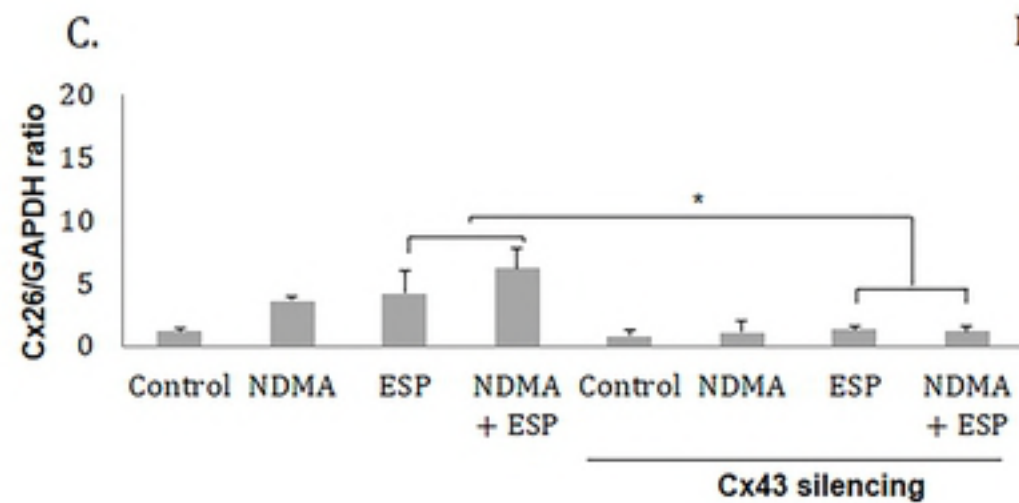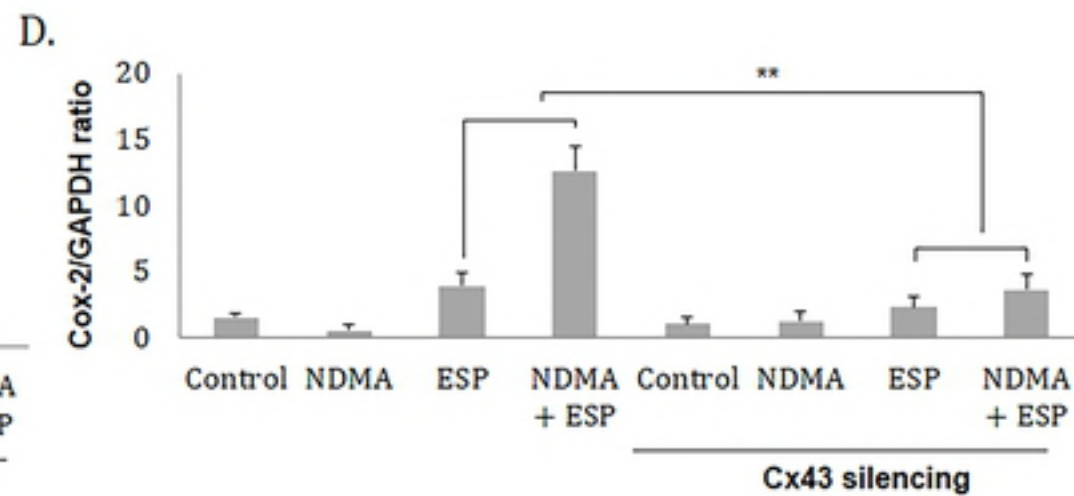

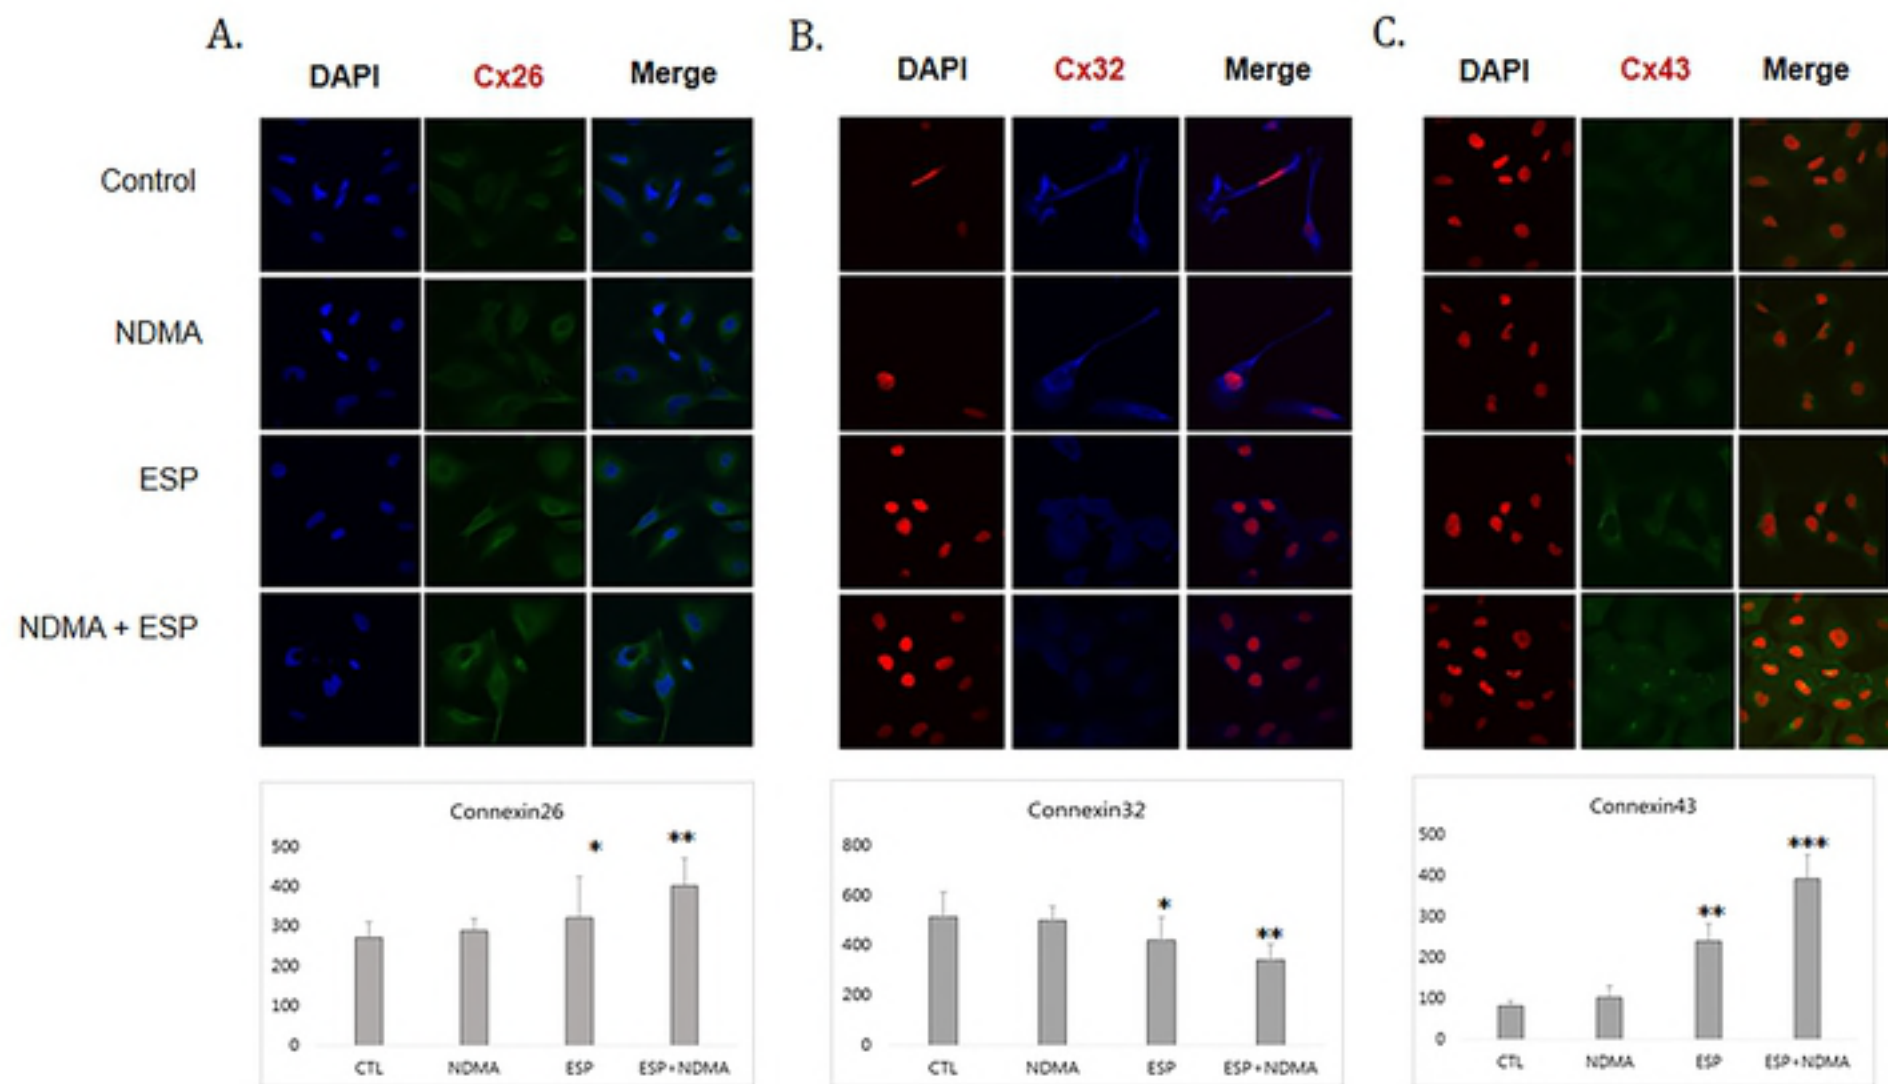

Source: https://www.biorxiv.org/content/10.1101/418350v1.full.pdf
